# Supplementary material for: On the role of moist and dry processes in atmospheric blocking biases in the Euro-Atlantic region in CMIP6
Source: Copernicus journal article supplement (doi:10.5194/wcd-6-471-2025), 2025-04-22
Supplement: Supplementary file 1 [file wcd-6-471-2025-supplement.pdf]

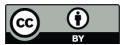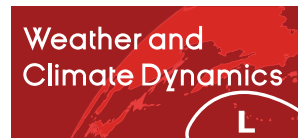

Open Access

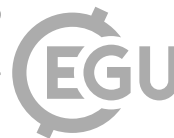

*Supplement of*

## **On the role of moist and dry processes in atmospheric blocking biases in the Euro-Atlantic region in CMIP6**

**Edgar Dolores-Tesillos et al.**

*Correspondence to:* Edgar Dolores-Tesillos (edgar.dolores@unibe.ch)

The copyright of individual parts of the supplement might differ from the article licence.

# 1 Stormtrack biases

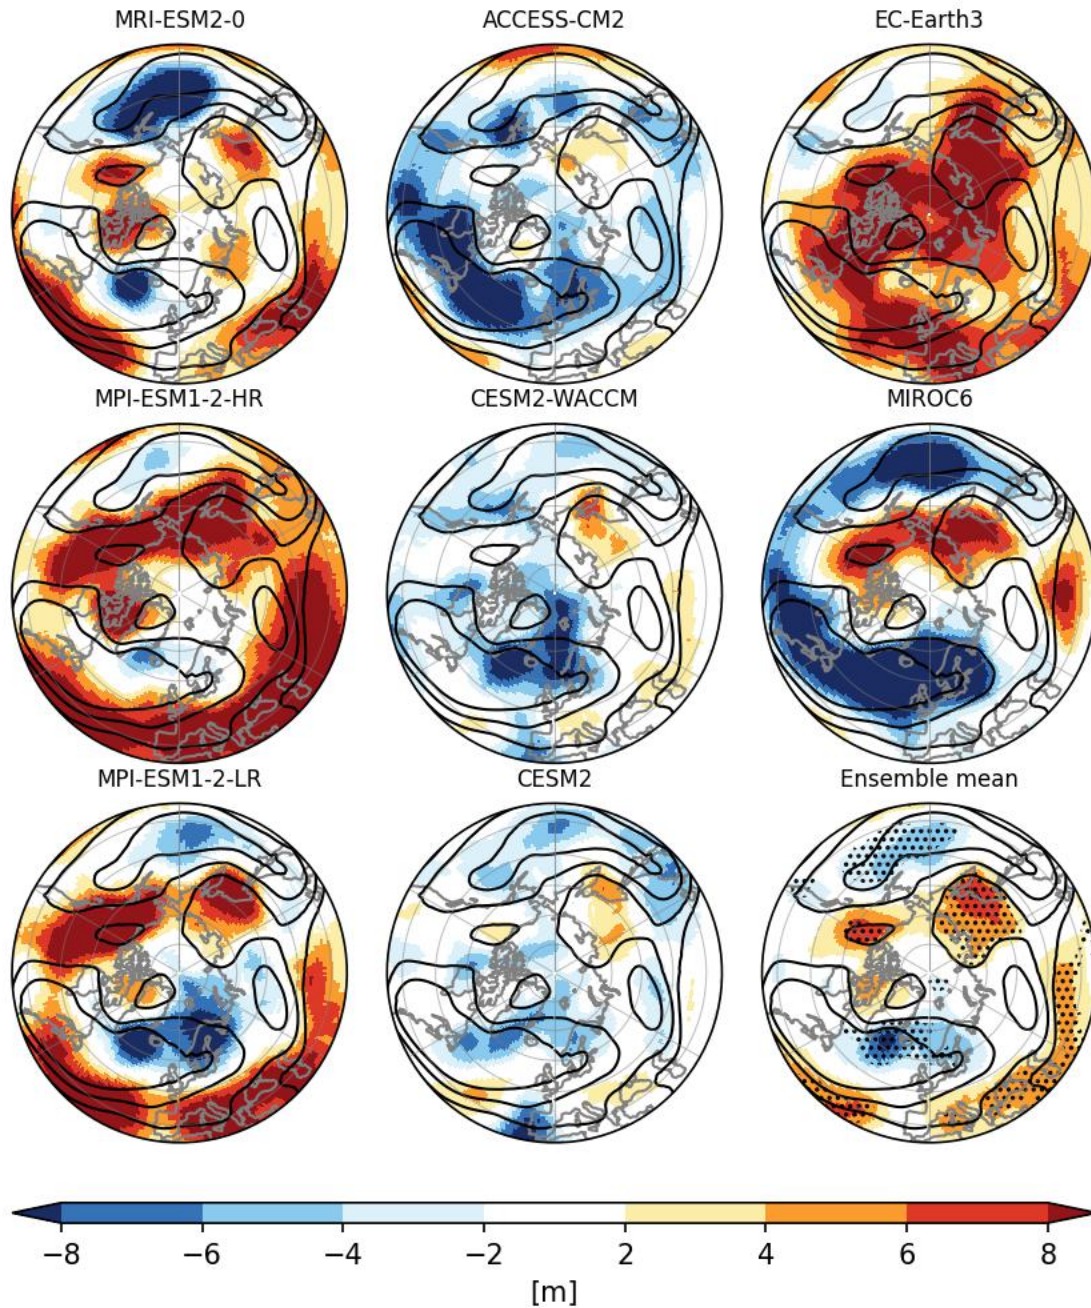

Figure S1: a-h) Storm tracks (standard deviation of the band-pass filtered Z at 500 hPa in units of m) biases of individual CMIP6 models and i) multi-model mean against ERA5 (1979-2014). Black contours depict the ERA5 storm tracks (every 10 m, starting from 40 m). Stippling denotes regions where more than 80% (6 models) of the ensemble members indicate a bias of the same sign.
